# Supplementary material for: Abbreviated World Health Organization Quality of Life questionnaire (WHOQOL-Bref) in north Indian patients with bronchial asthma: an evaluation using Rasch analysis
Source: PubMed Central journal article supplement — NPJ Prim Care Respir Med. 2014 Jun 12;24:14001–. doi: 10.1038/npjpcrm.2014.1 (PMC4373256; doi:10.1038/npjpcrm.2014.1), 2014-06-12
Supplement: npjpcrm20141-s1.pdf [file npjpcrm20141-s1.pdf]

Table S1. Individual item difficulty (location with its SE) and tests of fit (residuals and chi-square and its probability) for abbreviated World Health Organization Quality of Life (WHOQOL-Bref) questionnaire

| Item                             | Location | SE    | Fit Residual | Chi-Square | Probability |
|----------------------------------|----------|-------|--------------|------------|-------------|
| Physical <sup>a</sup>            |          |       |              |            |             |
| - Item 3                         | -0.360   | 0.161 | 2.703        | 11.127     | 0.004       |
| - Item 4                         | -0.226   | 0.176 | 0.672        | 0.051      | 0.975       |
| - Item 10                        | 0.809    | 0.162 | 0.873        | 3.777      | 0.151       |
| - Item 15                        | -0.486   | 0.170 | 0.594        | 0.172      | 0.918       |
| - Item 16                        | -0.778   | 0.158 | 0.346        | 7.166      | 0.028       |
| - Item 17                        | 0.538    | 0.163 | -1.108       | 4.825      | 0.090       |
| - Item 18                        | 0.502    | 0.167 | -1.728       | 6.367      | 0.041       |
| Psychological <sup>b</sup>       |          |       |              |            |             |
| - Item 5                         | 0.485    | 0.177 | -0.379       | 2.432      | 0.296       |
| - Item 6                         | 0.501    | 0.216 | -0.742       | 5.464      | 0.065       |
| - Item 7                         | 0.435    | 0.171 | 1.937        | 6.856      | 0.032       |
| - Item 11                        | -0.123   | 0.147 | 1.498        | 0.257      | 0.880       |
| - Item 19                        | -0.345   | 0.155 | 0.094        | 0.205      | 0.903       |
| - Item 26                        | -0.953   | 0.172 | -0.224       | 1.369      | 0.504       |
| Social Relationship <sup>c</sup> |          |       |              |            |             |
| - Item 20                        | 0.323    | 0.189 | -0.580       | 0.720      | 0.698       |
| - Item 21                        | -0.968   | 0.242 | -0.307       | 4.012      | 0.135       |
| - Item 22                        | 0.646    | 0.170 | 0.693        | 1.901      | 0.387       |
| Environment <sup>d</sup>         |          |       |              |            |             |
| - Item 8                         | -0.815   | 0.189 | 0.774        | 0.401      | 0.818       |
| - Item 9                         | 0.451    | 0.164 | 1.542        | 9.621      | 0.008       |
| - Item 12                        | 0.341    | 0.143 | -0.531       | 0.126      | 0.939       |
| - Item 13                        | -0.055   | 0.150 | -0.420       | 4.193      | 0.123       |
| - Item 14                        | 0.322    | 0.144 | 0.022        | 0.357      | 0.837       |
| - Item 23                        | -0.378   | 0.171 | -0.651       | 3.290      | 0.193       |
| - Item 24                        | 0.048    | 0.153 | 0.100        | 1.292      | 0.524       |
| - Item 25                        | 0.086    | 0.145 | 0.238        | 0.262      | 0.877       |

SE Standard error

Probability significance tested after Bonferroni adjustment at <sup>a</sup>p <0.007, <sup>b</sup>p <0.008, <sup>c</sup>p <0.017 and <sup>d</sup>p <0.006

Table S2. Analysis of variance of standardized residuals of sets of questionnaire items and their response categories, for both the native and the rescored WHOQOL-Bref scales. Probability values are based on F ratios for each item within three separate analyses based on age, gender and asthma control respectively, and were tested after Bonferroni correction.

|                                  | Native instrument |         |        |         |         |         | Rescored instrument |         |        |         |         |         |
|----------------------------------|-------------------|---------|--------|---------|---------|---------|---------------------|---------|--------|---------|---------|---------|
|                                  | Age               |         | Gender |         | Control |         | Age                 |         | Gender |         | Control |         |
|                                  | F                 | P value | F      | P value | F       | P value | F                   | P value | F      | P value | F       | P value |
| Physical <sup>a</sup>            |                   |         |        |         |         |         |                     |         |        |         |         |         |
| - Item 3                         | 0.545             | 0.583   | 0.395  | 0.532   | 3.740   | 0.030   |                     |         |        |         |         |         |
| - Item 4                         | 1.112             | 0.336   | 0.000  | 0.985   | 1.048   | 0.357   | 1.181               | 0.314   | 0.004  | 0.950   | 0.466   | 0.630   |
| - Item 10                        | 0.079             | 0.924   | 1.495  | 0.226   | 0.363   | 0.697   | 0.317               | 0.729   | 1.921  | 0.171   | 1.719   | 0.188   |
| - Item 15                        | 0.544             | 0.583   | 1.240  | 0.270   | 0.186   | 0.830   | 0.670               | 0.515   | 1.740  | 0.192   | 0.357   | 0.701   |
| - Item 16                        | 2.212             | 0.119   | 0.443  | 0.508   | 1.107   | 0.337   | 2.131               | 0.128   | 0.164  | 0.687   | 0.624   | 0.539   |
| - Item 17                        | 0.159             | 0.853   | 5.150  | 0.027   | 0.358   | 0.700   | 0.052               | 0.949   | 4.399  | 0.040   | 0.089   | 0.915   |
| - Item 18                        | 2.088             | 0.133   | 0.671  | 0.416   | 3.494   | 0.037   | 2.258               | 0.114   | 0.401  | 0.529   | 2.395   | 0.100   |
| Psychological <sup>b</sup>       |                   |         |        |         |         |         |                     |         |        |         |         |         |
| - Item 5                         | 0.401             | 0.671   | 4.502  | 0.038   | 0.179   | 0.837   | 0.297               | 0.745   | 3.894  | 0.053   | 0.133   | 0.875   |
| - Item 6                         | 0.718             | 0.492   | 0.002  | 0.966   | 1.177   | 0.315   | 0.636               | 0.533   | 0.019  | 0.890   | 0.944   | 0.395   |
| - Item 7                         | 1.809             | 0.173   | 0.703  | 0.405   | 0.800   | 0.454   | 2.167               | 0.124   | 1.104  | 0.298   | 0.804   | 0.453   |
| - Item 11                        | 0.075             | 0.928   | 0.009  | 0.926   | 0.331   | 0.720   | 0.447               | 0.642   | 0.087  | 0.769   | 0.058   | 0.944   |
| - Item 19                        | 1.158             | 0.321   | 0.195  | 0.661   | 1.421   | 0.250   | 1.527               | 0.226   | 0.404  | 0.527   | 1.669   | 0.197   |
| - Item 26                        | 1.882             | 0.162   | 0.045  | 0.832   | 1.914   | 0.157   | 1.681               | 0.195   | 0.001  | 0.979   | 1.368   | 0.263   |
| Social Relationship <sup>c</sup> |                   |         |        |         |         |         |                     |         |        |         |         |         |
| - Item 20                        | 0.132             | 0.876   | 1.493  | 0.228   | 2.001   | 0.147   | 0.124               | 0.884   | 1.255  | 0.268   | 2.538   | 0.091   |
| - Item 21                        | 5.020             | 0.011   | 1.043  | 0.312   | 0.567   | 0.571   | 5.380               | 0.008   | 1.143  | 0.290   | 0.694   | 0.505   |
| - Item 22                        | 1.737             | 0.186   | 2.419  | 0.126   | 1.595   | 0.213   | 1.936               | 0.155   | 2.218  | 0.142   | 1.639   | 0.204   |
| Environment <sup>d</sup>         |                   |         |        |         |         |         |                     |         |        |         |         |         |
| - Item 8                         | 0.688             | 0.507   | 0.688  | 0.507   | 1.541   | 0.223   | 0.761               | 0.472   | 0.132  | 0.717   | 1.996   | 0.145   |
| - Item 9                         | 0.622             | 0.541   | 0.622  | 0.541   | 0.511   | 0.603   | 1.152               | 0.323   | 1.106  | 0.297   | 0.732   | 0.485   |
| - Item 12                        | 0.558             | 0.575   | 0.558  | 0.575   | 0.271   | 0.764   | 0.524               | 0.595   | 0.296  | 0.588   | 0.263   | 0.770   |
| - Item 13                        | 0.123             | 0.884   | 0.123  | 0.884   | 0.385   | 0.682   | 0.363               | 0.697   | 0.096  | 0.758   | 0.215   | 0.807   |
| - Item 14                        | 3.143             | 0.051   | 3.143  | 0.051   | 2.139   | 0.127   | 4.186               | 0.020   | 0.515  | 0.476   | 1.590   | 0.213   |
| - Item 23                        | 3.697             | 0.031   | 3.697  | 0.031   | 1.754   | 0.182   | 3.525               | 0.036   | 0.000  | 0.998   | 1.107   | 0.337   |
| - Item 24                        | 0.025             | 0.975   | 0.025  | 0.975   | 2.506   | 0.090   | 0.022               | 0.978   | 1.357  | 0.249   | 2.149   | 0.126   |
| - Item 25                        | 1.467             | 0.239   | 1.467  | 0.239   | 0.408   | 0.667   | 0.835               | 0.439   | 1.608  | 0.210   | 0.171   | 0.843   |

Probability significance tested at <sup>a</sup>p <0.004, <sup>b</sup>p <0.004, <sup>c</sup>p <0.008 and <sup>d</sup>p <0.003

Table S3. Item threshold parameters for different domains

| Questionnaire items<br>and domains | Threshold (in logits) between response<br>categories in the native instrument |         |         |         | Response<br>rescoring<br>pattern* | Threshold (in logits) between response<br>categories in rescored instrument |         |         |         |
|------------------------------------|-------------------------------------------------------------------------------|---------|---------|---------|-----------------------------------|-----------------------------------------------------------------------------|---------|---------|---------|
|                                    | 1 and 2                                                                       | 2 and 3 | 3 and 4 | 4 and 5 |                                   | 1 and 2                                                                     | 2 and 3 | 3 and 4 | 4 and 5 |
| Physical                           |                                                                               |         |         |         |                                   |                                                                             |         |         |         |
| - Item 3                           | -5.703                                                                        | 0.037   | 1.645   | 2.580   | Deleted                           |                                                                             |         |         |         |
| - Item 4                           | -6.020                                                                        | 0.020   | 1.374   | 3.723   | 11234                             | -1.805                                                                      | -0.345  | 2.150   |         |
| - Item 10                          | -2.444                                                                        | 0.464   | 2.563   | 2.655   | 12344                             | -2.732                                                                      | 0.362   | 2.370   |         |
| - Item 15                          | -5.629                                                                        | -0.628  | 1.689   | 2.625   | 11234                             | -2.084                                                                      | 0.380   | 1.705   |         |
| - Item 16                          | -5.414                                                                        | -0.188  | 0.523   | 1.968   | 11234                             | -1.093                                                                      | -0.309  | 1.402   |         |
| - Item 17                          | -2.140                                                                        | -0.149  | 1.342   | 3.100   | 12345                             | -2.960                                                                      | -0.774  | 0.847   | 2.887   |
| - Item 18                          | -1.977                                                                        | -0.439  | 1.204   | 3.219   | 12345                             | -2.768                                                                      | -1.043  | 0.747   | 3.064   |
| Psychological                      |                                                                               |         |         |         |                                   |                                                                             |         |         |         |
| - Item 5                           | -2.060                                                                        | -0.970  | 1.510   | 3.461   | 12345                             | -2.665                                                                      | -1.541  | 1.042   | 3.163   |
| - Item 6                           | -7.970                                                                        | -1.216  | 1.504   | 9.687   | 11233                             | -1.427                                                                      | 1.427   |         |         |
| - Item 7                           | -3.012                                                                        | -0.079  | 1.249   | 3.581   | 12345                             | -3.708                                                                      | -0.415  | 0.834   | 3.289   |
| - Item 11                          | -2.377                                                                        | -0.612  | 1.247   | 1.249   | 12344                             | -1.800                                                                      | 0.221   | 1.578   |         |
| - Item 19                          | -1.948                                                                        | -1.570  | 0.763   | 1.375   | 12345                             | -1.665                                                                      | -1.247  | 1.145   | 1.767   |
| - Item 26                          | -7.332                                                                        | 0.329   | -1.102  | 4.293   | 11123                             | -2.547                                                                      | 2.547   |         |         |
| Social Relationship                |                                                                               |         |         |         |                                   |                                                                             |         |         |         |
| - Item 20                          | 0.232                                                                         | -2.876  | 0.617   | 3.317   | 11234                             | -2.850                                                                      | 0.072   | 2.778   |         |
| - Item 21                          | -4.748                                                                        | -2.986  | 0.852   | 3.009   | 11234                             | -3.356                                                                      | 0.610   | 2.746   |         |
| - Item 22                          | -1.376                                                                        | -0.583  | 1.109   | 3.432   | 12345                             | -1.863                                                                      | -1.308  | 0.425   | 2.746   |
| Environment                        |                                                                               |         |         |         |                                   |                                                                             |         |         |         |
| - Item 8                           | -6.292                                                                        | -1.288  | 1.011   | 3.307   | 11234                             | -2.391                                                                      | -0.019  | 2.410   |         |
| - Item 9                           | -0.801                                                                        | -1.642  | 1.197   | 3.050   | 11234                             | -2.316                                                                      | 0.293   | 2.023   |         |
| - Item 12                          | -0.716                                                                        | -1.244  | 2.556   | 0.768   | 11233                             | -1.406                                                                      | 1.406   |         |         |
| - Item 13                          | -3.107                                                                        | -0.179  | 1.482   | 1.582   | 12344                             | -2.864                                                                      | 0.795   | 2.068   |         |
| - Item 14                          | -0.765                                                                        | -1.210  | 1.615   | 1.640   | 11233                             | -1.112                                                                      | 1.112   |         |         |
| - Item 23                          | -1.648                                                                        | -1.776  | -0.372  | 2.285   | 11234                             | -1.888                                                                      | -0.341  | 2.229   |         |
| - Item 24                          | -1.793                                                                        | -0.883  | 0.481   | 2.387   | 12345                             | -2.066                                                                      | -0.985  | 0.550   | 2.501   |
| - Item 25                          | -0.004                                                                        | -2.125  | 0.589   | 1.884   | 11234                             | -1.980                                                                      | 0.379   | 1.601   |         |

Response categories of items 3, 4 and 26 were inverted for analysis.

\* Adjacent response categories were collapsed while rescoring. For example, 11233 means that the first and second categories were collapsed into the new first category, the third category thus becoming the new second category, and the original fourth and fifth categories were collapsed to form the new third category.
